# Supplementary material
Source: PubMed Central journal article supplement (PMC11472841)
Supplement: NIHMS2028005-supplement-Supp_2.pdf [file NIHMS2028005-supplement-Supp_2.pdf]

# INSTRUMENT UNDER DEVELOPMENT: NOT VALIDATED

## Weight Stigma in Health Care Inventory

In the **PAST 12 MONTHS**, and **ONLY the University of Iowa Hospitals and Clinics (UIHC)**, how often have the following things happened?

| <b>Questions:<br/>Overall Experiences</b> |                                                                                                                                                         | <b>Frequency</b> |                     |                  |              |               |                       |
|-------------------------------------------|---------------------------------------------------------------------------------------------------------------------------------------------------------|------------------|---------------------|------------------|--------------|---------------|-----------------------|
|                                           |                                                                                                                                                         | <b>Never</b>     | <b>Occasionally</b> | <b>Sometimes</b> | <b>Often</b> | <b>Always</b> | <b>Not Applicable</b> |
| 1                                         | I felt looked down upon by health care providers because of my weight.                                                                                  | 0                | 1                   | 2                | 3            | 4             | N/A                   |
| 2                                         | Health care providers treated me with respect.                                                                                                          | 0                | 1                   | 2                | 3            | 4             | N/A                   |
| 3                                         | Health care providers were less nice to me than other people because of my weight.                                                                      | 0                | 1                   | 2                | 3            | 4             | N/A                   |
| 4                                         | I was treated as a lesser person due to being overweight.                                                                                               | 0                | 1                   | 2                | 3            | 4             | N/A                   |
| 5                                         | I observed UIHC employees treating overweight patients rudely by staring, using negative body language, or making negative comments about their weight. | 0                | 1                   | 2                | 3            | 4             | N/A                   |
| 6                                         | I was treated extremely badly due to my weight.                                                                                                         | 0                | 1                   | 2                | 3            | 4             | N/A                   |
| <b>Questions:<br/>Communication</b>       |                                                                                                                                                         | <b>Frequency</b> |                     |                  |              |               |                       |
|                                           |                                                                                                                                                         | <b>Never</b>     | <b>Occasionally</b> | <b>Sometimes</b> | <b>Often</b> | <b>Always</b> | <b>Not Applicable</b> |
| 7                                         | Health care providers talked to me about weight loss diets too much.                                                                                    | 0                | 1                   | 2                | 3            | 4             | N/A                   |
| 8                                         | Health care providers avoided the topic of weight loss diets even though I wanted the topic addressed.                                                  | 0                | 1                   | 2                | 3            | 4             | N/A                   |
| 9                                         | Health care providers blamed my health problems on my weight more than they should have.                                                                | 0                | 1                   | 2                | 3            | 4             | N/A                   |
| 10                                        | I was able to speak freely with health care providers about my weight.                                                                                  | 0                | 1                   | 2                | 3            | 4             | N/A                   |
| 11                                        | Health care providers showed compassion when I talked about how difficult it is to be overweight.                                                       | 0                | 1                   | 2                | 3            | 4             | N/A                   |
| 12                                        | Health care providers said insensitive things to me about my weight.                                                                                    | 0                | 1                   | 2                | 3            | 4             | N/A                   |
| 13                                        | My health care provider did not seem to believe me when I honestly said how much I eat or exercise.                                                     | 0                | 1                   | 2                | 3            | 4             | N/A                   |
| 14                                        | Due to my weight, UIHC employees treated me rudely by staring, or using negative body language.                                                         | 0                | 1                   | 2                | 3            | 4             | N/A                   |

| <b>Questions:<br/>Physical Exam</b>             |                                                                                                                                                                        | <b>Frequency</b> |                     |                  |              |               |                       |
|-------------------------------------------------|------------------------------------------------------------------------------------------------------------------------------------------------------------------------|------------------|---------------------|------------------|--------------|---------------|-----------------------|
|                                                 |                                                                                                                                                                        | <b>Never</b>     | <b>Occasionally</b> | <b>Sometimes</b> | <b>Often</b> | <b>Always</b> | <b>Not Applicable</b> |
| 15                                              | I felt pressured into being weighed when I did not want to be weighed.                                                                                                 | 0                | 1                   | 2                | 3            | 4             | N/A                   |
| 16                                              | I was weighed in a manner that respected my privacy.                                                                                                                   | 0                | 1                   | 2                | 3            | 4             | N/A                   |
| 17                                              | Health care providers did not conduct an adequate physical exam because of my weight.                                                                                  | 0                | 1                   | 2                | 3            | 4             | N/A                   |
| 18                                              | Health care providers performed respectful physical exams.                                                                                                             | 0                | 1                   | 2                | 3            | 4             | N/A                   |
| 19                                              | Health care providers expressed distaste with my weight (either verbally or non-verbally) during my physical exam.                                                     | 0                | 1                   | 2                | 3            | 4             | N/A                   |
| <b>Questions:<br/>Equipment and Environment</b> |                                                                                                                                                                        | <b>Frequency</b> |                     |                  |              |               |                       |
|                                                 |                                                                                                                                                                        | <b>Never</b>     | <b>Occasionally</b> | <b>Sometimes</b> | <b>Often</b> | <b>Always</b> | <b>Not Applicable</b> |
| 20                                              | UIHC provided chairs, furniture, and easily accessible buildings suitable for people of my weight.                                                                     | 0                | 1                   | 2                | 3            | 4             | N/A                   |
| 21                                              | UIHC provided gowns, examination tables, imaging equipment and other medical equipment suitable for people of my weight.                                               | 0                | 1                   | 2                | 3            | 4             | N/A                   |
| 22                                              | If I needed help getting on to an examination table, walking, or transferring to the toilet, someone at UIHC was available to help me in a courteous manner.           | 0                | 1                   | 2                | 3            | 4             | N/A                   |
| 23                                              | Spaces such as waiting rooms, examination rooms, bathrooms, elevators, and hallways at UIHC were an appropriate size for people of my weight.                          | 0                | 1                   | 2                | 3            | 4             | N/A                   |
| 24                                              | Transportation provided by UIHC, including vans to the hospital, motorized transportation within the hospital, and wheelchairs, were suitable for people of my weight. | 0                | 1                   | 2                | 3            | 4             | N/A                   |
| 25                                              | UIHC's public signs, website, advertising, and announcements addressed weight in a way that was offensive.                                                             | 0                | 1                   | 2                | 3            | 4             | N/A                   |

| Questions:<br>Consequences |                                                                                                                                               | Frequency |              |           |       |        |                |
|----------------------------|-----------------------------------------------------------------------------------------------------------------------------------------------|-----------|--------------|-----------|-------|--------|----------------|
|                            |                                                                                                                                               | Never     | Occasionally | Sometimes | Often | Always | Not Applicable |
| 26                         | I avoided seeking medical care or cancer screening (such as colonoscopy or Pap smear) because of how my weight has been negatively addressed. | 0         | 1            | 2         | 3     | 4      | N/A            |
| 27                         | I avoided seeking medical care because I did not want to be weighed.                                                                          | 0         | 1            | 2         | 3     | 4      | N/A            |
| 28                         | I considered switching hospitals/health care systems due to negative experiences related to my weight.                                        | 0         | 1            | 2         | 3     | 4      | N/A            |
| 29                         | I felt hurt because of my negative weight-related experiences at UIHC.                                                                        | 0         | 1            | 2         | 3     | 4      | N/A            |
| 30                         | I discouraged people from going to UIHC due to negative experiences related to my weight.                                                     | 0         | 1            | 2         | 3     | 4      | N/A            |
| 31                         | I felt comfortable taking care of all of my health care needs at UIHC.                                                                        | 0         | 1            | 2         | 3     | 4      | N/A            |

**If you have had negative experiences related to your weight at UIHC, please circle who was involved (you may choose more than one):**

Doctors      Nurses      Dietitians      Mental health provider      Radiology Technician      Receptionist

Other (describe job) \_\_\_\_\_

**What term do you prefer when discussing weight?**

Obese      High Body Mass Index      Overweight      Weight      Person with overweight      Heavy

Other (please specify) \_\_\_\_\_

**Any other comments regarding weight and your experiences at UIHC:**

**Thank you for participating in our survey.**

**Demographics**

**What is your age?** \_\_\_\_\_

**What is your gender?**        **Male**            **Female**            **Other (please specify)**\_\_\_\_\_

**Please enter your: Height** \_\_\_\_ ft \_\_\_\_ in                    **Weight** \_\_\_\_\_ lb

**How many people live in your household?** \_\_\_\_\_

**Considering all family income from all sources, for you and all the family members living with you, what was your total family income in the last year (before taxes)?**

<\$25,000        \$25,000- \$75,000        \$75,000- \$125,000        \$125,000-\$175,000        >\$175,000

**What is the highest level of schooling you completed?**

|                       |                       |                     |
|-----------------------|-----------------------|---------------------|
| Less than high school | High School           | Some College        |
| 2 year College Degree | 4 year College Degree | Trade School Degree |
| Graduate Work         | Master’s Degree       | Doctorate or more   |

**Race (Please circle all that apply):**

Black/ African American        Asian (or Pacific Islander)        White / Caucasian  
Native American                Other (Please describe)\_\_\_\_\_

**Ethnicity (Please circle all that apply):**

Hispanic                    Non-Hispanic                    Other (Please describe)\_\_\_\_\_

**Current Zip Code:** \_\_\_\_\_

**In general, how would you describe your health?**

Poor            Fair            Good            Very Good            Excellent

**Have you had weight loss (bariatric) surgery in the past?**                    Yes    No

**If not, are you considering weight loss (bariatric) surgery?**                    Yes    No
